# Supplementary material for: Effect of Apple Juice Enrichment with Selected Plant Materials: Focus on Bioactive Compounds and Antioxidant Activity
Source: MDPI journal article supplement (doi:10.3390/foods12010105), 2022-12-25
Supplement: s1 [file s1]

# Effect of Apple Juice Enrichment with Selected Plant Materials: Focus on Bioactive Compounds and Antioxidant Activity

Katarzyna Angelika Gil, Aneta Wojdyło, Paulina Nowicka, Paola Montoro, and Carlo Ignazio Giovanni Tuberoso

**Table S1.** Spearman correlation coefficients and significance level ( $p \leq 0.05$  and  $p \leq 0.01$ , see legend at the bottom of the table).

|                                   | L*      | a*      | b*      | DM <sup>1</sup> | Ashes   | TSS <sup>2</sup> | TA <sup>3</sup> | TSS <sup>2</sup> /TA <sup>3</sup> | pH      | Vitamin C | Fructose | Sorbitol | Glucose | Sucrose | Total sugars |
|-----------------------------------|---------|---------|---------|-----------------|---------|------------------|-----------------|-----------------------------------|---------|-----------|----------|----------|---------|---------|--------------|
| a*                                | -0.2063 |         |         |                 |         |                  |                 |                                   |         |           |          |          |         |         |              |
| b*                                | 0.9567  | 0.0324  |         |                 |         |                  |                 |                                   |         |           |          |          |         |         |              |
| DM <sup>1</sup>                   | -0.1847 | 0.7826  | 0.0424  |                 |         |                  |                 |                                   |         |           |          |          |         |         |              |
| Ashes                             | -0.5372 | 0.3853  | -0.3666 | 0.7654          |         |                  |                 |                                   |         |           |          |          |         |         |              |
| TSS <sup>2</sup>                  | -0.2300 | 0.8895  | 0.0100  | 0.9795          | 0.6894  |                  |                 |                                   |         |           |          |          |         |         |              |
| TA <sup>3</sup>                   | -0.0928 | 0.8830  | 0.1536  | 0.9617          | 0.6055  | 0.9791           |                 |                                   |         |           |          |          |         |         |              |
| TSS <sup>2</sup> /TA <sup>3</sup> | -0.5070 | 0.3221  | -0.3320 | 0.4641          | 0.6744  | 0.4598           | 0.3465          |                                   |         |           |          |          |         |         |              |
| pH                                | -0.5726 | 0.4268  | -0.4483 | 0.7601          | 0.8651  | 0.7002           | 0.6516          | 0.3220                            |         |           |          |          |         |         |              |
| Vitamin C                         | 0.4205  | 0.7632  | 0.5984  | 0.5339          | -0.0759 | 0.6206           | 0.6818          | 0.0689                            | -0.0933 |           |          |          |         |         |              |
| Fructose                          | -0.2752 | 0.7402  | -0.1659 | 0.6974          | 0.4634  | 0.7456           | 0.6833          | 0.0335                            | 0.6100  | 0.4089    |          |          |         |         |              |
| Sorbitol                          | 0.1211  | 0.7195  | 0.2157  | 0.6067          | 0.1750  | 0.6625           | 0.6536          | -0.1802                           | 0.3218  | 0.6526    | 0.9118   |          |         |         |              |
| Glucose                           | -0.5635 | 0.8817  | -0.3837 | 0.6980          | 0.4642  | 0.8079           | 0.7222          | 0.4770                            | 0.5234  | 0.4943    | 0.7376   | 0.5799   |         |         |              |
| Sucrose                           | 0.3509  | 0.6335  | 0.5795  | 0.8223          | 0.4588  | 0.7850           | 0.8519          | 0.2942                            | 0.3533  | 0.7334    | 0.3788   | 0.4993   | 0.3272  |         |              |
| Total sugars                      | -0.3383 | 0.8280  | -0.1983 | 0.7543          | 0.4948  | 0.8186           | 0.7512          | 0.1561                            | 0.6196  | 0.4784    | 0.9844   | 0.8829   | 0.8417  | 0.4212  |              |
| Oxalic acid                       | -0.3971 | 0.2137  | -0.2710 | 0.7358          | 0.9299  | 0.6144           | 0.5569          | 0.5761                            | 0.8591  | -0.1245   | 0.3107   | 0.0636   | 0.3051  | 0.4761  | 0.3357       |
| Citric acid                       | -0.4173 | 0.2423  | -0.2814 | 0.7477          | 0.9427  | 0.6322           | 0.5745          | 0.5955                            | 0.8667  | -0.1129   | 0.3210   | 0.0677   | 0.3295  | 0.4838  | 0.3501       |
| Tartaric                          | 0.4562  | -0.4357 | 0.2604  | -0.2556         | -0.2635 | -0.3389          | -0.3366         | -0.6634                           | -0.1400 | -0.1992   | 0.1680   | 0.3100   | -0.4726 | -0.1784 | 0.0077       |
| Malic acid                        | -0.4280 | 0.9264  | -0.2074 | 0.8721          | 0.5816  | 0.9410           | 0.9092          | 0.4124                            | 0.6870  | 0.5578    | 0.7503   | 0.6175   | 0.9291  | 0.5711  | 0.8434       |
| Quinic acid                       | 0.2434  | 0.8759  | 0.4388  | 0.5720          | 0.0026  | 0.6860           | 0.7269          | 0.0890                            | 0.0094  | 0.9668    | 0.5600   | 0.7398   | 0.6340  | 0.6723  | 0.6288       |
| Shikimic acid                     | -0.7421 | 0.2783  | -0.6441 | 0.6401          | 0.8906  | 0.5789           | 0.4626          | 0.6343                            | 0.8801  | -0.2325   | 0.4114   | 0.0629   | 0.5394  | 0.1785  | 0.4606       |

|                              |         |         |         |                 |         |                  |                 |                                   |         |           |          |          |         |         |              |
|------------------------------|---------|---------|---------|-----------------|---------|------------------|-----------------|-----------------------------------|---------|-----------|----------|----------|---------|---------|--------------|
| Total organic acids          | -0.1967 | 0.7911  | 0.0313  | 0.9993          | 0.7619  | 0.9828           | 0.9604          | 0.4846                            | 0.7502  | 0.5430    | 0.6964   | 0.6043   | 0.7163  | 0.8163  | 0.7579       |
| Sugar/organic acids          | -0.3064 | 0.2543  | -0.3789 | -0.0693         | -0.1243 | 0.0351           | -0.0454         | -0.3571                           | 0.0810  | -0.0083   | 0.6593   | 0.5927   | 0.3773  | -0.3751 | 0.5969       |
| TP <sup>4</sup>              | -0.1336 | 0.1113  | -0.1657 | 0.4895          | 0.5123  | 0.3933           | 0.3380          | -0.1535                           | 0.6897  | -0.1157   | 0.6828   | 0.5662   | 0.1840  | 0.2010  | 0.5880       |
| CUPRAC                       | 0.0189  | -0.1489 | -0.0665 | 0.2628          | 0.2772  | 0.1408           | 0.1658          | -0.4403                           | 0.5953  | -0.2755   | 0.3539   | 0.2847   | -0.1287 | 0.0814  | 0.2462       |
| FRAP                         | -0.2869 | 0.1583  | -0.2827 | 0.6065          | 0.6212  | 0.5025           | 0.4584          | 0.0216                            | 0.8430  | -0.1290   | 0.5593   | 0.3812   | 0.2899  | 0.2583  | 0.5187       |
| ORAC                         | -0.6689 | 0.0815  | -0.6553 | 0.3950          | 0.7593  | 0.3254           | 0.2228          | 0.2014                            | 0.8425  | -0.4837   | 0.5302   | 0.1879   | 0.2843  | -0.0664 | 0.4798       |
| DPPH•                        | -0.1806 | -0.0668 | -0.2141 | 0.4465          | 0.5150  | 0.3114           | 0.3030          | -0.0852                           | 0.7572  | -0.2735   | 0.3114   | 0.1574   | 0.0426  | 0.1822  | 0.2588       |
| ABTS••                       | -0.1988 | 0.0673  | -0.2105 | 0.5558          | 0.5887  | 0.4332           | 0.4027          | -0.0387                           | 0.8032  | -0.1703   | 0.4926   | 0.3380   | 0.1703  | 0.2587  | 0.4365       |
| Total anthocyanins           | -0.8219 | 0.2854  | -0.8446 | 0.0102          | 0.1147  | 0.1286           | -0.0116         | 0.2116                            | 0.2540  | -0.1734   | 0.4055   | 0.1460   | 0.6532  | -0.4972 | 0.4595       |
| Total hydroxybenzoic acids   | -0.0828 | 0.7913  | 0.1409  | 0.9737          | 0.6548  | 0.9646           | 0.9480          | 0.4925                            | 0.6204  | 0.6563    | 0.6317   | 0.6000   | 0.7061  | 0.8539  | 0.7071       |
| Total hydroxycinnamic acids  | 0.1596  | 0.7637  | 0.2984  | 0.3263          | -0.2720 | 0.4773           | 0.5461          | -0.1104                           | -0.1035 | 0.8486    | 0.3758   | 0.5504   | 0.5877  | 0.3893  | 0.4608       |
| Dihydrochalcones             | -0.1248 | 0.2374  | -0.1257 | -0.3746         | -0.5336 | -0.2010          | -0.1552         | -0.3773                           | -0.3464 | 0.1376    | 0.0449   | 0.0899   | 0.1784  | -0.3840 | 0.0654       |
| Total flavan-3-ols           | -0.6137 | 0.5208  | -0.5986 | 0.1765          | 0.0120  | 0.3206           | 0.2160          | 0.1184                            | 0.2134  | 0.1873    | 0.5488   | 0.4018   | 0.7936  | -0.2557 | 0.6184       |
| Polymeric proanthocyanidins  | 0.2051  | 0.0819  | 0.1769  | 0.5042          | 0.3769  | 0.3880           | 0.3710          | -0.2003                           | 0.5061  | 0.0980    | 0.5655   | 0.5867   | 0.0530  | 0.4003  | 0.4729       |
| Total flavonols              | -0.7466 | 0.2848  | -0.6814 | -0.0442         | 0.2065  | 0.0680           | 0.0109          | 0.1542                            | 0.2697  | -0.2702   | 0.2513   | -0.0191  | 0.4101  | -0.3769 | 0.2816       |
| Total polyphenols (UPLC-PDA) | -0.1461 | 0.3956  | -0.1168 | 0.6861          | 0.5345  | 0.6309           | 0.5683          | -0.0113                           | 0.7035  | 0.1847    | 0.8246   | 0.7380   | 0.4610  | 0.3817  | 0.7769       |
| Colour                       | 0.1999  | 0.1625  | 0.1340  | -0.3462         | -0.7377 | -0.1936          | -0.1970         | -0.2497                           | -0.6499 | 0.4481    | -0.0201  | 0.1894   | 0.2067  | -0.2641 | 0.0293       |
| Aroma                        | 0.7193  | -0.2871 | 0.6175  | -0.4715         | -0.7745 | -0.4424          | -0.3894         | -0.2616                           | -0.8742 | 0.3498    | -0.4803  | -0.1319  | -0.3894 | -0.0573 | -0.4717      |
| Taste                        | 0.6349  | -0.4412 | 0.4441  | -0.6728         | -0.9133 | -0.6368          | -0.5920         | -0.5556                           | -0.8681 | 0.1231    | -0.4159  | -0.1004  | -0.4751 | -0.3577 | -0.4554      |
| Consistency                  | -0.1493 | -0.0830 | -0.3196 | -0.0396         | -0.1471 | -0.0355          | -0.1319         | -0.2813                           | 0.0980  | -0.0931   | 0.3844   | 0.3587   | 0.2085  | -0.3450 | 0.3400       |
| Desirability                 | 0.5393  | -0.2863 | 0.4167  | -0.6652         | -0.9193 | -0.5804          | -0.5306         | -0.3620                           | -0.9479 | 0.2372    | -0.5012  | -0.1990  | -0.3432 | -0.3227 | -0.4877      |
|                              | L*      | a*      | b*      | DM <sup>1</sup> | Ashes   | TSS <sup>2</sup> | TA <sup>3</sup> | TSS <sup>2</sup> /TA <sup>3</sup> | pH      | Vitamin C | Fructose | Sorbitol | Glucose | Sucrose | Total sugars |

|                     | Oxalic acid | Citric acid | Tartaric acid | Malic acid | Quinic acid | Shikimic acid | Total acids | Sugar/ Organic acids | TP <sup>4</sup> | CUPRAC | FRAP | ORAC | DPPH• | ABTS•• |
|---------------------|-------------|-------------|---------------|------------|-------------|---------------|-------------|----------------------|-----------------|--------|------|------|-------|--------|
| Citric acid         | 0.9989      |             |               |            |             |               |             |                      |                 |        |      |      |       |        |
| Tartaric acid       | -0.1701     | -0.2039     |               |            |             |               |             |                      |                 |        |      |      |       |        |
| Malic acid          | 0.4810      | 0.5040      | -0.4648       |            |             |               |             |                      |                 |        |      |      |       |        |
| Quinic acid         | -0.1237     | -0.1041     | -0.2440       | 0.6683     |             |               |             |                      |                 |        |      |      |       |        |
| Shikimic acid       | 0.8936      | 0.8986      | -0.2842       | 0.5819     | -0.1572     |               |             |                      |                 |        |      |      |       |        |
| Total organic acids | 0.7299      | 0.7421      | -0.2721       | 0.8800     | 0.5810      | 0.6443        |             |                      |                 |        |      |      |       |        |
| Sugar/Organic acids | -0.3269     | -0.3207     | 0.3848        | 0.1891     | 0.1807      | -0.0379       | -0.0669     |                      |                 |        |      |      |       |        |

|                              |             |             |               |            |             |               |             |                      |                 |         |         |         |         |         |
|------------------------------|-------------|-------------|---------------|------------|-------------|---------------|-------------|----------------------|-----------------|---------|---------|---------|---------|---------|
| TP <sup>4</sup>              | 0.5693      | 0.5504      | 0.5996        | 0.2900     | -0.0696     | 0.5258        | 0.4747      | 0.3788               |                 |         |         |         |         |         |
| CUPRAC                       | 0.4599      | 0.4342      | 0.5948        | 0.0738     | -0.2852     | 0.3504        | 0.2385      | 0.1473               | 0.8562          |         |         |         |         |         |
| FRAP                         | 0.7590      | 0.7417      | 0.2967        | 0.4446     | -0.1120     | 0.7321        | 0.5953      | 0.1177               | 0.9006          | 0.8609  |         |         |         |         |
| ORAC                         | 0.6889      | 0.6914      | 0.1497        | 0.3268     | -0.3378     | 0.7925        | 0.3838      | 0.3445               | 0.7503          | 0.5985  | 0.7430  |         |         |         |
| DPPH•                        | 0.7264      | 0.7034      | 0.3201        | 0.2438     | -0.3019     | 0.6396        | 0.4302      | -0.0709              | 0.8118          | 0.9160  | 0.9549  | 0.6611  |         |         |
| ABTS•+                       | 0.7486      | 0.7280      | 0.3699        | 0.3478     | -0.1725     | 0.6763        | 0.5412      | 0.0636               | 0.9086          | 0.9035  | 0.9916  | 0.7216  | 0.9750  |         |
| Total anthocyanins           | -0.0399     | -0.0253     | -0.2483       | 0.3992     | 0.0058      | 0.4087        | 0.0307      | 0.6579               | 0.0829          | -0.1203 | 0.1287  | 0.3863  | -0.0398 | 0.0209  |
| Total hydroxybenzoic acids   | 0.6520      | 0.6610      | -0.2826       | 0.8525     | 0.6571      | 0.5523        | 0.9788      | -0.1348              | 0.3852          | 0.1479  | 0.5163  | 0.2135  | 0.3533  | 0.4619  |
| Total hydroxycinnamic acids  | -0.3460     | -0.3268     | -0.3541       | 0.5950     | 0.8845      | -0.2744       | 0.3371      | 0.2085               | -0.2644         | -0.3008 | -0.2087 | -0.4679 | -0.3353 | -0.2792 |
| Dihydrochalcones             | -0.7301     | -0.7039     | -0.2445       | 0.0520     | 0.2805      | -0.4915       | -0.3711     | 0.5103               | -0.4825         | -0.4038 | -0.5566 | -0.2947 | -0.5998 | -0.6041 |
| Total flavan-3-ols           | -0.1144     | -0.1010     | -0.2417       | 0.5784     | 0.3379      | 0.2901        | 0.1987      | 0.6669               | 0.0904          | -0.1186 | 0.1438  | 0.1882  | -0.0580 | 0.0263  |
| Polymeric proanthocyanidins  | 0.5090      | 0.4820      | 0.6720        | 0.2037     | 0.0573      | 0.3397        | 0.4898      | 0.1662               | 0.9247          | 0.8124  | 0.8230  | 0.4734  | 0.7646  | 0.8539  |
| Total flavonols              | -0.0715     | -0.0356     | -0.4303       | 0.2934     | -0.0339     | 0.2327        | -0.0422     | 0.4974               | -0.1420         | -0.2287 | -0.1488 | 0.4173  | -0.2461 | -0.2192 |
| Total polyphenols (UPLC-PDA) | 0.5733      | 0.5598      | 0.4257        | 0.5465     | 0.2302      | 0.5633        | 0.6801      | 0.3875               | 0.9354          | 0.7113  | 0.8818  | 0.6275  | 0.7272  | 0.8566  |
| Colour                       | -0.7722     | -0.7723     | -0.0322       | -0.0248    | 0.4360      | -0.5603       | -0.3229     | 0.3565               | -0.4480         | -0.4992 | -0.5094 | -0.6711 | -0.5907 | -0.5610 |
| Aroma                        | -0.6516     | -0.6709     | 0.1985        | -0.4922    | 0.1729      | -0.7465       | -0.4583     | -0.2254              | -0.4954         | -0.4230 | -0.5722 | -0.8937 | -0.5053 | -0.5366 |
| Taste                        | -0.7926     | -0.8174     | 0.4389        | -0.6165    | -0.0090     | -0.7999       | -0.6647     | 0.0687               | -0.3427         | -0.2177 | -0.4857 | -0.7422 | -0.4076 | -0.4455 |
| Consistency                  | -0.0394     | -0.0674     | 0.5401        | 0.0538     | -0.0884     | 0.1754        | -0.0294     | 0.5587               | 0.5532          | 0.4430  | 0.4938  | 0.2368  | 0.4037  | 0.4619  |
| Desirability                 | -0.8706     | -0.8806     | 0.0955        | -0.5136    | 0.1288      | -0.8357       | -0.6505     | -0.0192              | -0.6508         | -0.5416 | -0.7380 | -0.8912 | -0.6763 | -0.7218 |
|                              | Oxalic acid | Citric acid | Tartaric acid | Malic acid | Quinic acid | Shikimic acid | Total acids | Sugar/ Organic acids | TP <sup>4</sup> | CUPRAC  | FRAP    | ORAC    | DPPH•   | ABTS•+  |

|                             | Total anthocyanins | Total hydroxybenzoic acids | Total hydroxycinnamic acids | Dihydrochalcones | Total flavan-3-ols | Polymeric proanthocyanidins | Total flavonols | Total Polyphenols (UPLC-PDA) | Colour | Aroma | Taste | Consistency |
|-----------------------------|--------------------|----------------------------|-----------------------------|------------------|--------------------|-----------------------------|-----------------|------------------------------|--------|-------|-------|-------------|
| Total hydroxybenzoic acids  | -0.0182            |                            |                             |                  |                    |                             |                 |                              |        |       |       |             |
| Total hydroxycinnamic acids | 0.1698             | 0.4196                     |                             |                  |                    |                             |                 |                              |        |       |       |             |
| Dihydrochalcones            | 0.4118             | -0.3918                    | 0.5591                      |                  |                    |                             |                 |                              |        |       |       |             |
| Total flavan-3-ols          | 0.9217             | 0.1984                     | 0.5007                      | 0.4589           |                    |                             |                 |                              |        |       |       |             |
| Polymeric proanthocyanidins | -0.2063            | 0.4643                     | -0.1810                     | -0.6260          | -0.1047            |                             |                 |                              |        |       |       |             |
| Total flavonols             | 0.6685             | -0.1801                    | 0.0902                      | 0.6503           | 0.4969             | -0.4887                     |                 |                              |        |       |       |             |

|                              |                           |                                   |                                    |                         |                           |                                    |                        |                                     |               |              |              |                    |
|------------------------------|---------------------------|-----------------------------------|------------------------------------|-------------------------|---------------------------|------------------------------------|------------------------|-------------------------------------|---------------|--------------|--------------|--------------------|
| Total polyphenols (UPLC-PDA) | 0.1790                    | 0.6325                            | 0.0259                             | -0.4371                 | 0.2902                    | 0.8993                             | -0.1694                |                                     |               |              |              |                    |
| Colour                       | 0.3415                    | -0.1834                           | 0.6391                             | 0.5682                  | 0.5431                    | -0.3572                            | -0.0479                | -0.2526                             |               |              |              |                    |
| Aroma                        | -0.3593                   | -0.2725                           | 0.2343                             | 0.0453                  | -0.1886                   | -0.1942                            | -0.6386                | -0.4125                             | 0.6864        |              |              |                    |
| Taste                        | -0.1881                   | -0.5191                           | 0.1438                             | 0.2055                  | -0.0663                   | -0.1299                            | -0.4987                | -0.3415                             | 0.7280        | 0.9117       |              |                    |
| Consistency                  | 0.5000                    | 0.0025                            | -0.0118                            | -0.1253                 | 0.5612                    | 0.5135                             | -0.2005                | 0.5914                              | 0.3684        | 0.1079       | 0.3386       |                    |
| Desirability                 | -0.1192                   | -0.4938                           | 0.3150                             | 0.3976                  | 0.0056                    | -0.4545                            | -0.3132                | -0.5873                             | 0.8257        | 0.9220       | 0.9261       | 0.0905             |
|                              | <b>Total anthocyanins</b> | <b>Total hydroxybenzoic acids</b> | <b>Total hydroxycinnamic acids</b> | <b>Dihydrochalcones</b> | <b>Total flavan-3-ols</b> | <b>Polymeric proanthocyanidins</b> | <b>Total flavonols</b> | <b>Total Polyphenols (UPLC-PDA)</b> | <b>Colour</b> | <b>Aroma</b> | <b>Taste</b> | <b>Consistency</b> |

Legend

|                  |                                           |  |                              |
|------------------|-------------------------------------------|--|------------------------------|
| DM <sup>1</sup>  | Dry matter                                |  |                              |
| TSS <sup>2</sup> | Total soluble solids                      |  | significant at $p \leq 0.05$ |
| TA <sup>3</sup>  | Total acidity                             |  | significant at $p \leq 0.01$ |
| TP <sup>4</sup>  | Total phenols by Folin-Chiocalteu's assay |  |                              |

**Table S2.** Quantification of phenolic compounds by UPLC-PDA method (mg/100 g fw).

| Code                 | Compound                                                   | R <sub>t</sub> | λ <sub>max</sub> | MS [M-H] <sup>-</sup> | MS/MS [M-H] <sup>-</sup>   | Juice composition (mg/100 g fw) |            |            |             |            |            |             |
|----------------------|------------------------------------------------------------|----------------|------------------|-----------------------|----------------------------|---------------------------------|------------|------------|-------------|------------|------------|-------------|
|                      |                                                            | (min)          | (nm)             | (m/z)*                | (m/z)                      | AJ                              | AJ+S01     | AJ+S05     | AJ+M5       | AJ+F5      | AJ+P5      | AJ+C5       |
| Anthocyanins         |                                                            |                |                  |                       |                            |                                 |            |            |             |            |            |             |
| A1                   | Delphinidin-3,5- <i>O</i> -diglucoside                     | 3.040          | 518              | 627.2785 <sup>+</sup> | 465.1909/303.1100          | nd                              | 0.17±0.01b | 1.77±0.02a | nd          | nd         | nd         | nd          |
| A2                   | Delphinidin-3- <i>O</i> -glucoside                         | 3.856          | 515              | 465.1953 <sup>+</sup> | 303.1100                   | nd                              | nd         | 0.37±0.04b | 10.55±0.31a | nd         | nd         | nd          |
| A3                   | Delphinidin-pentoside                                      | 4.133          | 520              | 435.1818 <sup>+</sup> | 303.1100                   | nd                              | nd         | nd         | 0.23±0.02a  | nd         | nd         | nd          |
| A4                   | Cyanidin-3- <i>O</i> -galactoside                          | 4.135          | 515              | 449.1959 <sup>+</sup> | 287.1116                   | nd                              | nd         | nd         | nd          | nd         | nd         | 1.04±0.11a  |
| A5                   | Cyanidin-3- <i>O</i> -glucoside                            | 4.397          | 520              | 449.1959 <sup>+</sup> | 287.1116                   | nd                              | nd         | nd         | 3.32±0.26b  | 3.69±0.36a | nd         | nd          |
| A6                   | Cyanidin-3- <i>O</i> -arabinoside                          | 4.629          | 515              | 419.1797 <sup>+</sup> | 287.1116                   | nd                              | nd         | nd         | nd          | nd         | nd         | 0.04±0.00a  |
| A7                   | Petunidin-3- <i>O</i> -glucoside                           | 4.648          | 525              | 479.2150 <sup>+</sup> | 317.1295                   | nd                              | nd         | nd         | 0.83±0.11a  | nd         | nd         | nd          |
| A8                   | Peonidin-3- <i>O</i> -glucoside                            | 5.156          | 525              | 463.2164 <sup>+</sup> | 301.1330                   | nd                              | nd         | nd         | 0.04±0.00a  | nd         | nd         | nd          |
| A9                   | Malvidin-3- <i>O</i> -glucoside                            | 5.391          | 519              | 493.2339 <sup>+</sup> | 331.1495                   | nd                              | nd         | nd         | 17.05±0.24a | nd         | nd         | nd          |
| Total                |                                                            |                |                  |                       |                            | nd                              | 0.17±0.01e | 2.14±0.03c | 32.02±0.15a | 3.69±0.36b | nd         | 1.08±0.05d  |
| Hydroxybenzoic acids |                                                            |                |                  |                       |                            |                                 |            |            |             |            |            |             |
| B1                   | Gallic acid glucoside I                                    | 1.156          | 280              | 331.1266              | 271.1605/169.1417          | nd                              | nd         | nd         | nd          | nd         | nd         | 1.03±0.02a  |
| B2                   | Galloyl glucoside I                                        | 1.274          | 277              | 331.1334              | 169.0417                   | nd                              | nd         | nd         | nd          | nd         | nd         | 2.06±0.02a  |
| B3                   | Galloyl HHDP-glucose I                                     | 1.325          | 271              | 633,1283              | 481.0828/301.0667          | nd                              | nd         | nd         | 2.52±0.03a  | nd         | nd         | nd          |
| B4                   | Galloyl glucoside II                                       | 1.331          | 270              | 331,0639              | 169.0117                   | nd                              | nd         | nd         | nd          | nd         | 1.10±0.01a | nd          |
| B5                   | Gallic acid glucoside II                                   | 1.366          | 270              | 331.1334              | 271.1990/169.1417          | nd                              | nd         | nd         | nd          | nd         | nd         | 0.54±0.01a  |
| B6                   | 3- <i>O</i> -Galloylquinic acid<br>(Theogallin)            | 1.551          | 273              | 343.0742              | 191.1410                   | nd                              | nd         | nd         | nd          | nd         | nd         | 23.10±0.74a |
| B7                   | Galloyl HHDP-glucose II                                    | 1.591          | 272              | 633,1283              | 481.0828/301.0667          | nd                              | nd         | nd         | 2.43±0.06a  | nd         | nd         | nd          |
| B8                   | Galloyl glucoside III                                      | 1.627          | 273              | 331,0639              | 169.0117                   | nd                              | nd         | nd         | nd          | nd         | 1.70±0.12a | nd          |
| B9                   | Digalloyl-HHDP-glucose                                     | 1.892          | 280              | 785,1292              | 633.0180/481.0828/301.0631 | nd                              | nd         | nd         | 0.39±0.02a  | nd         | nd         | nd          |
| B10                  | Gallic acid 4- <i>O</i> -β- <i>D</i> -glucopyra-<br>noside | 2.080          | 320              | 331.1334              | 169.0417                   | nd                              | nd         | nd         | nd          | nd         | nd         | 0.03±0.00a  |
| B11                  | Castalagin                                                 | 2.084          | 280              | 933.1019              | 785.1813/481.0917/301.1057 | nd                              | nd         | nd         | nd          | 7.87±0.52a | nd         | nd          |
| B12                  | Galloyl shikimic acid                                      | 2.314          | 272              | 325.0878              | 169.0417/125.4180          | nd                              | nd         | nd         | nd          | nd         | nd         | 0.70±0.09a  |
| B13                  | Casuarin                                                   | 2.420          | 374              | 783.1445              | 481.0421/301.0667          | nd                              | nd         | nd         | nd          | 1.15±0.03a | nd         | nd          |

|                       |                                                   |       |     |          |                            |                   |                   |                   |                   |                    |                   |                    |
|-----------------------|---------------------------------------------------|-------|-----|----------|----------------------------|-------------------|-------------------|-------------------|-------------------|--------------------|-------------------|--------------------|
| B14                   | Ellagitannin I                                    | 2.435 | 280 | 933.1457 | 633.0283/481.0783/301.0667 | nd                | nd                | nd                | 0.13±0.01a        | nd                 | nd                | nd                 |
| B15                   | Digalloylquinic acid I                            | 2.755 | 273 | 495.1837 | 343.1255/191.3072          | nd                | nd                | nd                | nd                | nd                 | nd                | 0.21±0.03a         |
| B16                   | Ellagitannin II                                   | 2.829 | 270 | 933.1114 | 781.0445/633.7131/301.1057 | nd                | nd                | nd                | nd                | 9.34±0.12a         | nd                | nd                 |
| B17                   | Ellagitannin III                                  | 3.035 | 275 | 783.0645 | 481.0186/301.1021          | nd                | nd                | nd                | 1.50±0.21a        | nd                 | nd                | nd                 |
| B18                   | Digalloylquinic acid II                           | 3.210 | 276 | 495.0435 | 343.1158/191.3100          | nd                | nd                | nd                | nd                | nd                 | nd                | 0.26±0.02a         |
| B19                   | Ellagitannin IV                                   | 3.331 | 280 | 783.0759 | 481.0917/301.0667          | nd                | nd                | nd                | nd                | 0.64±0.03a         | nd                | nd                 |
| B20                   | Nilocitin                                         | 3.653 | 270 | 481.0938 | 301.0667/257.1438          | nd                | nd                | nd                | nd                | 0.26±0.02a         | nd                | nd                 |
| B21                   | Digalloyl shikimic acid I                         | 4.129 | 278 | 477.0493 | 325.0808/169.0417          | nd                | nd                | nd                | nd                | nd                 | nd                | 0.98±0.08a         |
| B22                   | Casuarinin                                        | 4.391 | 278 | 935.0146 | 765.1799/545.1230          | nd                | nd                | nd                | nd                | 3.56±0.23a         | nd                | nd                 |
| B23                   | Digalloyl shikimic acid II                        | 4.618 | 275 | 477.0493 | 325.0806/169.0417          | nd                | nd                | nd                | nd                | nd                 | nd                | 0.18±0.02a         |
| B24                   | Strictinin ellagitannin                           | 4.700 | 275 | 633.0900 | 463.1637/301.0667/275.1263 | nd                | nd                | nd                | nd                | nd                 | nd                | 0.21±0.01a         |
| B25                   | Ellagic acid arabinoside                          | 5.703 | 359 | 433.0224 | 301.0631                   | nd                | nd                | nd                | nd                | 0.87±0.06a         | nd                | nd                 |
| B26                   | Ellagic acid xyloside                             | 5.885 | 361 | 433.0735 | 301.0631                   | nd                | nd                | nd                | nd                | 0.52±0.03a         | nd                | nd                 |
| B27                   | Ellagic acid                                      | 6.028 | 366 | 300.0631 |                            | nd                | nd                | nd                | nd                | 3.04±0.13a         | nd                | nd                 |
| B28                   | Methyl ellagic acid                               | 8.128 | 360 | 394.0062 | 315.1020/301.0631          | nd                | nd                | nd                | nd                | 1.11±0.24a         | nd                | nd                 |
| Total                 |                                                   |       |     |          |                            | <b>nd</b>         | <b>nd</b>         | <b>nd</b>         | <b>6.97±0.13c</b> | <b>28.36±0.15b</b> | <b>2.80±0.05d</b> | <b>29.28±0.11a</b> |
| Hydroxycinnamic acids |                                                   |       |     |          |                            |                   |                   |                   |                   |                    |                   |                    |
| C1                    | Neochlorogenic acid                               | 3.489 | 317 | 353.1287 | 191.3100/136.0212          | 0.33±0.03de       | 0.55±0.09a        | 0.27±0.02e        | 0.46±0.05b        | 0.45±0.02bc        | 0.37±0.01cd       | 0.42±0.02bc        |
| C2                    | Chlorogenic acid                                  | 3.723 | 323 | 353.0838 | 191.0534                   | 5.00±0.11c        | 5.43±0.06b        | 5.42±0.22b        | 5.46±0.32b        | 4.81±0.16c         | 5.10±0.21bc       | 6.62±0.21a         |
| C3                    | Caffeic acid                                      | 4.036 | 320 | 311.0807 | 179.1098                   | 0.20±0.02d        | 0.21±0.02cd       | 0.21±0.01cd       | 0.27±0.03b        | 0.33±0.01a         | 0.23±0.01cd       | 0.24±0.03bc        |
| C4                    | <i>p</i> -Coumaric acid                           | 4.463 | 323 | 163.0349 |                            | 0.13±0.00c        | 0.14±0.01bc       | 0.15±0.01b        | 0.28±0.02a        | 0.10±0.02d         | 0.13±0.01c        | 0.15±0.00bc        |
| C5                    | <i>p</i> -Coumaroyloquinic acid                   | 4.904 | 310 | 337.0912 | 163.1014                   | 0.92±0.11a        | 0.99±0.03a        | 1.01±0.00a        | 0.97±0.11a        | 0.93±0.08a         | 0.93±0.11a        | 0.99±0.03a         |
| Total                 |                                                   |       |     |          |                            | <b>6.58±0.05e</b> | <b>7.32±0.03b</b> | <b>7.06±0.02c</b> | <b>7.44±0.04b</b> | <b>6.62±0.10de</b> | <b>6.76±0.13d</b> | <b>8.42±0.11a</b>  |
| Dihydrochalcones      |                                                   |       |     |          |                            |                   |                   |                   |                   |                    |                   |                    |
| D1                    | Phloretin-2'- <i>O</i> -xyloglucoside             | 7.433 | 280 | 567.1703 | 273.0757                   | 2.08±0.42bc       | 2.22±0.04ab       | 2.43±0.10a        | 2.27±0.01ab       | 1.78±0.11c         | 2.10±0.04ab       | 2.23±0.06ab        |
| D2                    | Phloretin-2'- <i>O</i> -glucoside<br>(Phloridzin) | 8.186 | 280 | 435.1332 | 273.0733                   | 2.53±0.13b        | 2.74±0.17ab       | 2.76±0.05ab       | 2.89±0.12a        | 2.54±0.08b         | 2.61±0.11b        | 2.72±0.11ab        |
| Total                 |                                                   |       |     |          |                            | <b>4.61±0.10c</b> | <b>4.96±0.08b</b> | <b>5.19±0.11a</b> | <b>5.16±0.09a</b> | <b>4.32±0.10d</b>  | <b>4.71±0.12c</b> | <b>4.95±0.12b</b>  |
| Flavan-3-ols          |                                                   |       |     |          |                            |                   |                   |                   |                   |                    |                   |                    |
| E1                    | Procyanidin B1                                    | 3.256 | 280 | 577.1293 | 289.0708                   | 1.49±0.06c        | 1.61±0.10c        | 1.13±0.11d        | 11.25±0.23a       | 1.09±0.11d         | 1.60±0.06c        | 2.00±0.02b         |

|                 |                                                            |       |     |          |                   |                    |                    |                    |                    |                    |                    |                    |
|-----------------|------------------------------------------------------------|-------|-----|----------|-------------------|--------------------|--------------------|--------------------|--------------------|--------------------|--------------------|--------------------|
| E2              | Procyanidin B3                                             | 3.562 | 277 | 577.1055 | 289.2014/245.2391 | nd                 | nd                 | nd                 | nd                 | nd                 | nd                 | 0.06±0.00a         |
| E3              | (+)-Catechin                                               | 3.669 | 280 | 289.0673 | 245.0780          | 1.48±0.11e         | 1.79±0.05d         | 1.44±0.14e         | 2.18±0.22c         | 4.17±0.32b         | 1.92±0.06cd        | 5.72±0.14a         |
| E4              | (-)-Epicatechin                                            | 4.143 | 280 | 289.0673 | 245.0780          | 5.98±0.04d         | 7.20±0.22b         | 6.60±0.03c         | 7.20±0.05b         | 6.07±0.12d         | 6.83±0.11c         | 7.94±0.21a         |
| E5              | Procyanidin B2                                             | 4.631 | 280 | 577.1293 | 289.0708          | 1.65±0.11bc        | 1.79±0.06b         | 1.80±0.02b         | 6.43±0.11a         | 1.45±0.12d         | 1.76±0.04bc        | 1.62±0.12c         |
| E6              | Procyanidin C1                                             | 4.956 | 280 | 866.1908 | 577.1188/289.0708 | 0.40±0.01c         | 0.79±0.10a         | 0.61±0.03b         | 0.74±0.04a         | 0.44±0.02c         | 0.80±0.03a         | 0.62±0.04b         |
| Total           |                                                            |       |     |          |                   | <b>11.00±0.97d</b> | <b>13.18±0.79c</b> | <b>11.58±0.60d</b> | <b>27.80±1.24a</b> | <b>13.22±0.88c</b> | <b>12.91±0.67c</b> | <b>17.96±1.12b</b> |
| PP <sup>#</sup> | Polymeric proanthocyanidins                                |       |     |          |                   | 108.11±1.25e       | 109.15±2.56e       | 88.69±3.64f        | 118.40±2.54d       | 209.99±7.45b       | 242.68±3.56a       | 160.66±4.56c       |
| DP              | Degree of polymerisation                                   |       |     |          |                   | 3.53               | 3.64               | 3.28               | 3.66               | 4.78               | 4.10               | 4.11               |
| Flavonols       |                                                            |       |     |          |                   |                    |                    |                    |                    |                    |                    |                    |
| F1              | Kaempferol-3- <i>O</i> -sophoroside-7- <i>O</i> -glucoside | 3.546 | 346 | 771.0181 | 609.0240/285.1257 | nd                 | 0.39±0.02b         | 2.06±0.11a         | nd                 | nd                 | nd                 | nd                 |
| F2              | Quercetin-3,7- <i>O</i> -digalactoside                     | 4.519 | 349 | 625.0223 | 463.0290/301.0951 | nd                 | nd                 | 0.06±0.00a         | nd                 | nd                 | nd                 | nd                 |
| F3              | Kaempferol-3,7- <i>O</i> -diglucoside                      | 4.636 | 345 | 609.0341 | 447.0543/285.1292 | nd                 | 0.04±0.00b         | 0.15±0.01a         | nd                 | nd                 | nd                 | nd                 |
| F4              | Isorhamnetin-3,7- <i>O</i> -digalactoside                  | 4.747 | 350 | 639.0883 | 447.0327/315.0605 | nd                 | 0.24±0.03b         | 0.41±0.05a         | nd                 | nd                 | nd                 | nd                 |
| F5              | Quercetin derivative I                                     | 4.766 | 359 | 633.0900 | 463.0633/301.0667 | nd                 | nd                 | nd                 | nd                 | 0.09±0.00b         | nd                 | 0.21±0.02a         |
| F6              | Myricetin galactoside-gallate                              | 4.995 | 360 | 631.1107 | 479.1073/317.1114 | nd                 | nd                 | nd                 | 1.75±0.10a         | nd                 | nd                 | nd                 |
| F7              | Quercetin-3,7- <i>O</i> -diglucoside                       | 5.356 | 352 | 625.1044 | 463.0333/301.0924 | nd                 | 0.35±0.02b         | 2.26±0.22a         | nd                 | 0.09±0.02c         | nd                 | nd                 |
| F8              | Myricetin-3- <i>O</i> -galactoside                         | 5.460 | 356 | 479.0610 | 317.1114          | nd                 | nd                 | nd                 | 9.85±0.54a         | nd                 | nd                 | 0.33±0.02b         |
| F9              | Myricetin-3- <i>O</i> -glucoside                           | 5.534 | 356 | 479.0162 | 317.1114          | nd                 | nd                 | nd                 | 0.50±0.08a         | nd                 | nd                 | 0.25±0.03b         |
| F10             | Isorhamnetin-3,7- <i>O</i> -diglucoside                    | 5.709 | 343 | 639.1035 | 477.1314/315.0948 | nd                 | 0.17±0.00b         | 1.18±0.02a         | nd                 | nd                 | nd                 | nd                 |
| F11             | Quercetin galloylhexose                                    | 5.816 | 360 | 615.1291 | 463.0950/301.1092 | nd                 | nd                 | nd                 | nd                 | nd                 | nd                 | 0.08±0.00a         |
| F12             | Kaempferol-3- <i>O</i> -sophoroside                        | 5.978 | 358 | 609.0240 | 285.1226          | nd                 | 2.13±0.02b         | 11.84±0.35a        | nd                 | nd                 | nd                 | nd                 |
| F13             | Myricetin-3- <i>O</i> -arabinoside                         | 6.027 | 364 | 449.0362 | 317.0678          | nd                 | nd                 | nd                 | 1.18±0.01a         | nd                 | nd                 | nd                 |
| F14             | Quercetin derivative II                                    | 6.053 | 366 | 633.1003 | 463.0861/301.1021 | nd                 | nd                 | nd                 | nd                 | nd                 | nd                 | 0.27±0.01a         |
| F15             | Isorhamnetin-3- <i>O</i> -sophoroside                      | 6.158 | 352 | 639.0983 | 315.0948          | nd                 | nd                 | 0.20±0.01a         | nd                 | nd                 | nd                 | nd                 |
| F16             | Myricetin-3- <i>O</i> -xyloside                            | 6.161 | 350 | 449.1883 | 317.1114          | nd                 | nd                 | nd                 | nd                 | nd                 | nd                 | 0.03±0.00a         |
| F17             | Myricetin-3- <i>O</i> -rhamnoside                          | 6.239 | 347 | 463.0861 | 317.1114          | nd                 | nd                 | nd                 | 5.88±0.22a         | nd                 | nd                 | 0.02±0.00b         |
| F18             | Quercetin-3- <i>O</i> -galactoside                         | 6.345 | 348 | 463.0861 | 301.0994          | 0.57±0.07d         | 0.67±0.12cd        | 0.57±0.03d         | 1.05±0.02b         | 1.28±0.04a         | 0.66±0.02cd        | 0.75±0.11c         |
| F19             | Quercetin-3- <i>O</i> -glucoside                           | 6.494 | 350 | 463.1774 | 301.1447          | 0.10±0.00f         | 0.21±0.02c         | 0.40±0.01a         | 0.21±0.02bc        | 0.23±0.01b         | 0.14±0.00e         | 0.17±0.01d         |
| F20             | Kaempferol-3- <i>O</i> -galactoside                        | 6.640 | 347 | 447.0629 | 285.1326          | nd                 | nd                 | nd                 | nd                 | 0.53±0.03a         | nd                 | nd                 |

|                                                                  |                             |       |     |          |          |              |              |               |              |              |              |              |
|------------------------------------------------------------------|-----------------------------|-------|-----|----------|----------|--------------|--------------|---------------|--------------|--------------|--------------|--------------|
| F21                                                              | Isorhamnetin-3-O-rutinoside | 6.697 | 352 | 623.1223 | 315.0871 | nd           | 0.22±0.02b   | 1.32±0.06a    | nd           | nd           | nd           | nd           |
| F22                                                              | Quercetin-3-O-arabinoside   | 6.765 | 350 | 433.0160 | 301.1421 | 0.14±0.00b   | 0.18±0.03b   | 0.16±0.00b    | 0.17±0.04b   | 0.27±0.03a   | 0.15±0.01b   | 0.15±0.01b   |
| F23                                                              | Quercetin-pentoside         | 6.957 | 360 | 433.0565 | 301.0959 | nd           | nd           | nd            | nd           | 0.39±0.02a   | nd           | nd           |
| F24                                                              | Quercetin-3-O-xyloside      | 7.063 | 350 | 433.0160 | 301.1421 | 0.32±0.04c   | 0.41±0.03b   | 0.36±0.04bc   | 0.42±0.01b   | 0.68±0.10a   | 0.41±0.01b   | 0.74±0.02a   |
| F25                                                              | Quercetin-3-O-rhamnoside    | 7.325 | 348 | 447.0148 | 301.1447 | 0.50±0.03f   | 0.84±0.05d   | 1.52±0.11a    | 1.27±0.12b   | 0.53±0.03f   | 0.68±0.04e   | 1.07±0.06c   |
| F26                                                              | Isorhamnetin-3-O-glucoside  | 7.539 | 352 | 477.1314 | 315.0871 | nd           | nd           | 0.23±0.02a    | nd           | nd           | nd           | nd           |
| F27                                                              | Kaempferol-hexoside         | 7.568 | 350 | 447.1543 | 285.1326 | nd           | nd           | nd            | nd           | 0.21±0.01a   | nd           | nd           |
| F28                                                              | Myricetin                   | 7.683 | 367 | 317.1114 |          | nd           | nd           | nd            | 0.33±0.03a   | nd           | nd           | nd           |
| F29                                                              | Quercetin                   | 8.774 | 360 | 301.1065 |          | nd           | nd           | nd            | nd           | 0.05±0.00a   | nd           | nd           |
| F30                                                              | Kaempferol                  | 9.435 | 360 | 285.1706 |          | nd           | nd           | nd            | nd           | 3.78±0.12a   | nd           | nd           |
| Total                                                            |                             |       |     |          |          | 1.63±0.06f   | 5.85±0.10c   | 22.72±0.13a   | 22.61±0.11a  | 8.12±0.05b   | 2.04±0.03e   | 4.07±0.06d   |
| Total phenolic compounds (including polymeric proanthocyanidins) |                             |       |     |          |          | 131.93±3.45d | 140.64±5.12c | 137.37±3.44cd | 220.40±8.21b | 274.32±4.22a | 271.90±3.03a | 226.41±4.21b |

Data are given as mean ± standard deviation (n=3). nd: not detected. tr: traces. Mean values within a column with different letters (a-f) are significantly different (homogenous groups) at  $p \leq 0.05$ . \*  $[M+H]^+$

(m/z) for anthocyanins were obtained in the positive ion mode. # Quantitative data of polymeric proanthocyanidins were obtained using the phloroglucinol method.



**Table S3.** Consumer evaluation (5° hedonic scale).

| Juice composition | Qualitative discriminate |              |             |             |              |
|-------------------|--------------------------|--------------|-------------|-------------|--------------|
|                   | Colour                   | Aroma        | Taste       | Consistency | Desirability |
| AJ                | 3.40±0.70a               | 4.60±0.70a   | 4.30±0.67a  | 2.90±1.20a  | 4.50±0.53a   |
| AJ+S01            | 3.25±0.86ab              | 3.85±0.58ab  | 4.00±0.67a  | 2.90±1.20a  | 4.10±0.99a   |
| AJ+S05            | 2.50±0.97ab              | 2.70±0.67bc  | 2.95±0.76ab | 2.80±1.32a  | 3.20±0.79ab  |
| AJ+M5             | 3.85±1.16a               | 2.90±1.10bc  | 3.40±1.17ab | 3.00±1.25a  | 3.50±1.27ab  |
| AJ+F5             | 1.60±0.84b               | 2.15±1.06c   | 2.15±1.06b  | 2.90±1.29a  | 1.85±1.11b   |
| AJ+P5             | 2.95±0.83ab              | 3.60±0.52abc | 4.15±0.47a  | 3.00±1.15a  | 3.55±1.07ab  |
| AJ+C5             | 3.90±0.74a               | 4.10±0.74ab  | 3.75±0.86a  | 2.90±0.99a  | 4.00±1.33a   |

Data are given as mean ± standard deviation (n=3). Mean values within a column with different letters (a-c) are significantly different (homogenous groups) at  $p \leq 0.05$ .

*Malus domestica*

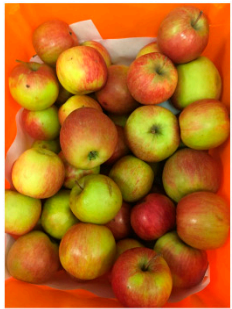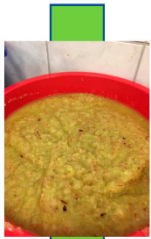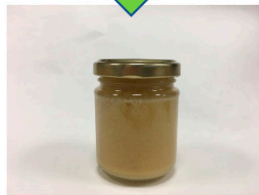

AJ

*Crocus sativus*

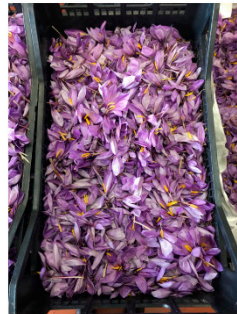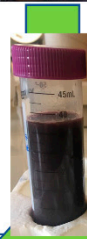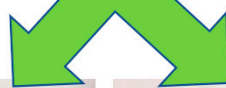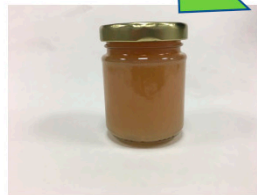

AJ+S01

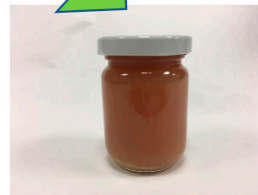

AJ+S05

*Arbutus unedo*

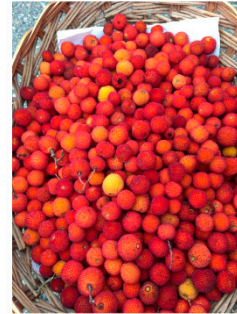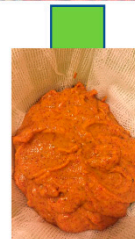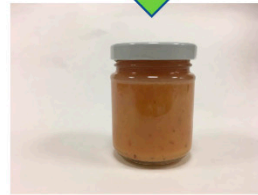

AJ+C5

*Acca sellowiana*

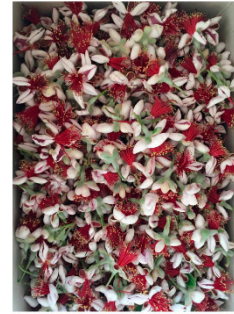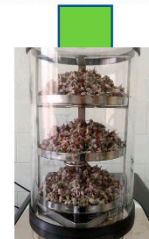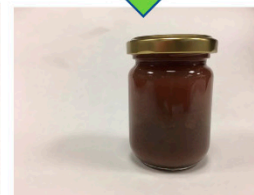

AJ+F5

*Diospyros kaki*

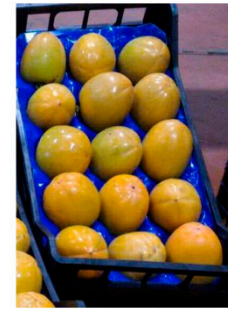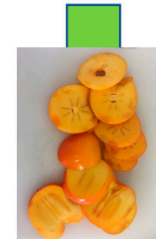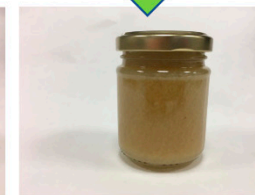

AJ+P5

*Myrtus communis*

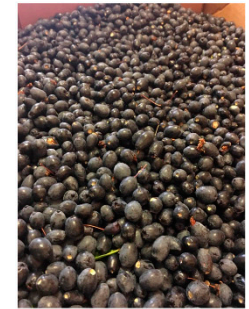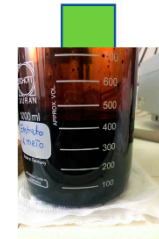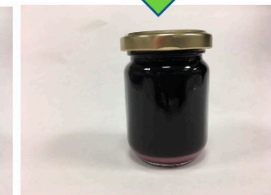

AJ+M5

**Figure S1.** Plant material used for the investigation, semi-finished products and the obtained final smoothies.
